# Supplementary material for: Towards Global QSAR Model Building for Acute Toxicity: Munro Database Case Study
Source: Int J Mol Sci. 2014 Oct 9;15(10):18162–74. doi: 10.3390/ijms151018162 (PMC4227209; doi:10.3390/ijms151018162)
Supplement: Supplementary File 1 [file ijms-15-18162-s001.xlsx]

## Sheet: 436_structures
Table S1. The details of the 436 compounds used for k-NN model development.
Sr.	CAS	Name	Smile	LD50 (mg/kg/d)	NOEL (mg/kg/d)
1	100-01-6	Nitroaniline, p-	Nc1ccc([N+]([O-])=O)cc1	750	3
2	100-41-4	Ethylbenzene	CCc1ccccc1	3500	136
3	100-42-5	Styrene	C=Cc1ccccc1	2650	12
4	100-51-6	Benzyl alcohol	OCc1ccccc1	1230	100
5	100-52-7	Benzaldehyde	O=Cc1ccccc1	1300	300
6	100-97-0	Hexamethylenetetramine	N12CN3CN(C1)CN(C2)C3	9200	1180
7	101-05-3	Anilazine	c1cccc(Cl)c1Nc2nc(Cl)nc(n2)Cl	2700	400
8	101200-48-0	Express	COC(=O)c1c(cccc1)S(=O)(=O)NC(=O)N(C)c(nc2C)nc(n2)OC	5000	1
9	1024-57-3	Heptachlor epoxide	ClC12C3C4C(O4)C(Cl)C3C(Cl)(C2(Cl)Cl)C(Cl)=C1Cl	15	0.25
10	10265-92-6	Methamidophos	COP(=O)(N)SC	7.5	1
11	103-23-1	Di(2-ethylhexyl)adipate	CCCCC(CC)COC(=O)CCCCC(=O)OCC(CC)CCCC	9100	170
12	1034-01-1	Octyl gallate	c1c(O)c(O)c(O)cc1C(=O)OCCCCCCCC	1960	89
13	103577-45-3	Lansoprazole	FC(F)(F)COc1ccnc(c1C)CS(=O)c(n2)[nH]c(c23)cccc3	5000	10
14	103-90-2	Acetaminophen	CC(=O)Nc1ccc(O)cc1	1944	110
15	10453-86-8	Resmethrin	CC(C)=CC1C(C1(C)C)C(=O)OCc2cc(oc2)Cc3ccccc3	1244	40
16	104-55-2	Cinnamaldehyde	O=CC=Cc1ccccc1	2220	125
17	104-61-0	Nonalactone, gamma-	CCCCCC(O1)CCC1=O	6600	360
18	104-67-6	Undecalactone, gamma-	CCCCCCCC(O1)CCC1=O	18500	360
19	104-76-7	Ethyl-1-hexanol, 2-	CCC(CO)CCCC	3730	125
20	105-54-4	Ethyl butyrate	CCOC(=O)CCC	13000	14.4
21	105-55-5	Diethylthiourea, N,N'-	CCNC(=S)NCC	316	43
22	105-60-2	Caprolactam	O=C1CCCCCN1	1210	50
23	105-67-9	Dimethylphenol, 2,4-	Cc1c(O)ccc(C)c1	3200	50
24	105-87-3	Geranyl acetate	CC(=O)OCC=C(C)CCC=C(C)C	6330	887
25	10605-21-7	Carbendazim	COC(=O)Nc(n1)[nH]c(c12)cccc2	6400	400
26	106-27-4	Isoamyl butyrate	CCCC(=O)OCCC(C)C	5000	887
27	106-30-9	Ethyl heptanoate	CCOC(=O)CCCCCC	34640	887
28	106-46-7	Dichlorobenzene, 1,4-	Clc1ccc(Cl)cc1	500	300
29	106-89-8	Epichlorohydrin	ClCC1CO1	90	2
30	107-06-2	Dichloroethane, 1,2-	ClCCCl	670	34
31	107-07-3	Ethylene chlorohydrin	OCCCl	71	45
32	107-13-1	Acrylonitrile	N#CC=C	78	25
33	1071-83-6	Glyphosate	O=C(O)CNCP(=O)(O)O	4873	10
34	107-18-6	Allyl alcohol	C=CCO	64	4.8
35	107-19-7	Propargyl alcohol	C#CCO	20	5
36	107-21-1	Ethylene glycol	OCCO	4700	100
37	108-30-5	Succinic anhydride	O=C1CCC(=O)O1	1510	75
38	108-31-6	Maleic anhydride	O=C1C=CC(=O)O1	400	40
39	108-39-4	Methylphenol, 3-	Cc1cc(O)ccc1	242	50
40	108-46-3	Resorcinol	Oc1cc(O)ccc1	301	32
41	108-60-1	Bis(2-chloro-1-methyl-ethyl)ether, Technical Grade	ClCC(C)OC(CCl)C	240	100
42	108-78-1	Melamine	Nc1nc(N)nc(n1)N	3161	170
43	108-88-3	Toluene	Cc1ccccc1	636	590
44	108-90-7	Chlorobenzene	Clc1ccccc1	1110	50
45	108-91-8	Cyclohexylamine	NC1CCCCC1	11	15
46	108-95-2	Phenol	Oc1ccccc1	317	153
47	109-69-3	Butyl chloride, n-	ClCCCC	2670	120
48	109-86-4	Ethyl glycol monomethyl ether	OCCOC	2370	12.5
49	109-94-4	Ethyl formate	O=COCC	1850	500
50	110-17-8	Fumaric acid	O=C(O)C=CC(=O)O	9300	720
51	110-43-0	Methyl amyl ketone	CC(=O)CCCCC	1670	20
52	110-86-1	Pyridine	c1ccncc1	891	1
53	110-89-4	Piperidine	C1CCNCC1	400	69
54	111-46-6	Diethylene glycol	OCCOCCO	6565	1250
55	112-14-1	Octyl acetate	CC(=O)OCCCCCCCC	3000	100
56	112-27-6	Triethylene glycol	OCCOCCOCCO	17000	0.5
57	114-26-1	Baygon	CNC(=O)Oc1c(OC(C)C)cccc1	41	10
58	115-28-6	Chlorendic acid	O=C(O)C1C(C(=O)O)C(Cl)(C2(Cl)Cl)C(Cl)=C(Cl)C12Cl	1000	70
59	115-32-2	Dicofol	c1cc(Cl)ccc1C(C(Cl)(Cl)Cl)(O)c2ccc(Cl)cc2	575	8
60	115-96-8	Tris-(2-chloroethyl) phosphate	ClCCOP(=O)(OCCCl)OCCCl	1230	22
61	116-06-3	Aldicarb	CNC(=O)ON=CC(C)(C)SC	0.5	0.3
62	1163-19-5	Decabromodiphenil oxide	Brc1c(Br)c(Br)c(Br)c(Br)c1Oc2c(Br)c(Br)c(Br)c(Br)c2Br	2000	3760
63	1166-52-5	Dodecyl gallate	c1c(O)c(O)c(O)cc1C(=O)OCCCCCCCCCCCC	5000	10
64	117-39-5	Quercetin	Oc1cc(O)cc(c12)oc(c(c2=O)O)-c3cc(O)c(O)cc3	161	400
65	117-81-7	Bis(2-ethylhexyl)phthalate	CCCCC(CC)COC(=O)c1c(cccc1)C(=O)OCC(CC)CCCC	30000	18
66	118-71-8	Maltol	Cc1c(O)c(=O)cco1	1410	20
67	118-74-1	Hexachlorobenzene	Clc1c(Cl)c(Cl)c(Cl)c(Cl)c1Cl	10000	0.08
68	118-92-3	Anthranilic acid	O=C(O)c1c(N)cccc1	5410	1376
69	118-96-7	Trinitrotoluene, 2,4,6-	Cc1c([N+]([O-])=O)cc([N+]([O-])=O)cc1[N+]([O-])=O	607	10
70	119-36-8	Methyl salicylate	COC(=O)c1c(O)cccc1	887	72
71	119-53-9	Benzoin	c1ccccc1C(=O)C(O)c2ccccc2	10000	12.5
72	119-84-6	Dihydrocoumarin, 3,4-	C1CC(=O)Oc(c12)cccc2	1460	150
73	120-23-0	Naphthoxy acetic acid, 2-	O=C(O)COc(c1)ccc(c12)cccc2	600	125
74	120-32-1	Benzyl-p-chlorophenol, o-	c1ccccc1Cc2c(O)ccc(Cl)c2	1700	120
75	120-47-8	Hydroxybenzoic acid ethyl ester, p-	CCOC(=O)c1ccc(O)cc1	200	1441
76	120-57-0	Piperonal	O=Cc(c1)ccc(c12)OCO2	2700	360
77	120-61-6	Dimethyl terephthalate	COC(=O)c1ccc(cc1)C(=O)OC	3200	250
78	120-83-2	Dichlorophenol, 2,4-	Oc1c(Cl)cc(Cl)cc1	47	0.3
79	121-14-2	Dinitrotoluene, 2,4-	Cc1c([N+]([O-])=O)cc([N+]([O-])=O)cc1	268	4
80	121-32-4	Ethyl vanillin	O=Cc1cc(c(O)cc1)OCC	1590	1441
81	121-33-5	Vanillin	O=Cc1cc(OC)c(O)cc1	1580	1441
82	121-69-7	Dimethylamine, N,N'-	CN(C)c1ccccc1	951	31
83	121-75-5	Malathion	CCOC(=O)C(SP(=S)(OC)OC)CC(=O)OCC	290	5
84	121-79-9	Propyl gallate	CCCOC(=O)c1cc(O)c(O)c(c1)O	2100	86
85	121-82-4	Hexahydro-1,3,5-trinitro-1,3,5-triazine	[O-][N+](=O)N1CN([N+]([O-])=O)CN(C1)[N+]([O-])=O	100	0.3
86	121-88-0	Amino-5-nitrophenol, 2-	Nc1c(O)cc([N+]([O-])=O)cc1	4000	100
87	122-34-9	Simazine	CCNc1nc(nc(n1)Cl)NCC	971	0.52
88	122-39-4	Diphenylamine	c1ccccc1Nc2ccccc2	1120	3.1
89	122-42-9	Propham	CC(C)OC(=O)Nc1ccccc1	1000	50
90	122-66-7	Hydrazobenzene	c1ccccc1NNc2ccccc2	301	14
91	122-99-6	Phenoxyethanol	OCCOc1ccccc1	1260	80
92	123-29-5	Ethyl nonanoate	CCOC(=O)CCCCCCCC	43000	887
93	123-30-8	Aminophenol, p-	Nc1ccc(O)cc1	375	196
94	123-31-9	Hydroquinone	Oc1ccc(O)cc1	302	25
95	123-33-1	Maleic hydrazine	O=c1ccc(=O)[nH][nH]1	3800	100
96	123-35-3	Myrcene, beta-	C=CC(=C)CCC=C(C)C	5000	250
97	123-66-0	Ethylhexanoic acid, 2-	CCOC(=O)CCCCC	5000	100
98	123-68-2	Allyl hexanoate	C=CCOC(=O)CCCCC	218	125
99	124-04-9	Adipic acid	O=C(O)CCCCC(=O)O	11000	250
100	124-48-1	Chlorodibromomethane	BrC(Cl)Br	370	125
101	125-12-2	Isobornyl acetate	CC(=O)OC1CC(CC2)C(C)(C)C12C	9050	15
102	127-18-4	Tetrachloroethylene	ClC(Cl)=C(Cl)Cl	2629	14
103	127-69-5	Sulfisoxazole	Cc1c(C)noc1NS(=O)(=O)c(cc2)ccc2N	10000	464
104	128-37-0	Butylated hydroxytoluene	CC(C)(C)c1c(O)c(C(C)(C)C)cc(C)c1	890	25
105	129-00-0	Pyrene	c12c3c4ccc1cccc2ccc3ccc4	2700	75
106	131-17-9	Diallyl phtalate	C=CCOC(=O)c1c(cccc1)C(=O)OCC=C	656	150
107	13171-21-6	Phosphamidon	CCN(CC)C(=O)C(Cl)=C(C)OP(=O)(OC)OC	8	6.2
108	133-06-2	Captan	ClC(Cl)(Cl)SN(C1=O)C(=O)C(C12)CC=CC2	9000	25
109	133-07-3	Folpet	ClC(Cl)(Cl)SN(C1=O)C(=O)c(c12)cccc2	2636	10
110	1334-78-7	Tolualdehyde	O=Cc1c(C)cccc1	2250	250
111	13366-73-9	Photodieldrin	ClC12C3(Cl)C4C5C6C(O6)C4C(C25)C(Cl)(C1(Cl)Cl)C3Cl	10	0.35
112	1338-41-6	Sorbitan monostearate	O1CC(O)C(O)C1C(O)COC(=O)CCCCCCCCCCCCCCCCC	31000	3602
113	133-90-4	Chloramben	O=C(O)c1c(Cl)c(N)cc(Cl)c1	3500	25
114	134-20-3	Methyl anthranilate	COC(=O)c1c(N)cccc1	2910	150
115	13593-03-8	Quinalphos	CCOP(=S)(OCC)Oc(n1)cnc(c12)cccc2	26	0.03
116	136-77-6	Hexylresorcinol, 4-	CCCCCCc1c(O)cc(O)cc1	550	62.5
117	137-17-7	Trimethylaniline, 2,4,5-	Cc1c(C)cc(N)c(C)c1	1250	16
118	137-26-8	Thiram	CN(C)C(=S)SSC(=S)N(C)C	560	5
119	139-40-2	Propazine	CC(C)Nc1nc(nc(n1)Cl)NC(C)C	3840	5
120	140-11-4	Benzyl acetate	CC(=O)OCc1ccccc1	2490	510
121	140-49-8	(chloroacetyl)-acetanilide, 4'-	ClCC(=O)c1ccc(cc1)NC(=O)C	2150	790
122	140-88-5	Ethyl acrylate	C=CC(=O)OCC	800	8.4
123	141-66-2	Bidrin	COP(=O)(OC)OC(C)=CC(=O)N(C)C	13	0.1
124	141-78-6	Ethyl acetate	CC(=O)OCC	5620	900
125	142-19-8	Allyl heptanoate	C=CCOC(=O)CCCCCC	500	49.6
126	142-46-1	Dithiobiurea, 2,5-	NC(=S)NNC(=S)N	500	473
127	144-62-7	Oxalic acid	O=C(O)C(=O)O	7500	840
128	145-73-3	Endothall	O=C(O)C(C12)C(C(=O)O)C(O2)CC1	38	5
129	148-24-3	Hydroxyquinoline, 8-	n1cccc(c12)cccc2O	1200	73
130	148-79-8	Thiabendazole	n1cscc1-c(n2)[nH]c(c23)cccc3	2080	10
131	14885-29-1	Ipronidazole	CC(C)c1ncc([N+]([O-])=O)n1C	470	10
132	149-29-1	Patulin	C1C(=O)OC(C=12)=CCOC2O	27.79	0.04
133	149-30-4	Mercaptobenzothiazole, 2-	[nH]1c(=S)sc(c12)cccc2	100	188
134	150-50-5	Merphos	CCCCSP(SCCCC)SCCCC	910	0.1
135	150-68-5	Monuron	CN(C)C(=O)Nc1ccc(Cl)cc1	1053	75
136	15299-99-7	Napropamide	CCN(CC)C(=O)C(C)Oc1cccc(c12)cccc2	5000	30
137	1563-66-2	Carbofuran	CNC(=O)Oc(ccc1)c(c12)OC(C)(C)C2	5	1
138	156-60-5	Dichloroethylene, trans-1,2-	ClC=CCl	1235	17
139	1582-09-8	Trifluralin	FC(F)(F)c1cc([N+]([O-])=O)c(c(c1)[N+]([O-])=O)N(CCC)CCC	1930	10
140	1596-84-5	Daminozide	CN(C)NC(=O)CCC(=O)O	8400	390
141	15972-60-8	Alachlor	COCN(C(=O)CCl)c(c1CC)c(CC)ccc1	930	2.5
142	1610-18-0	Prometon	CC(C)Nc1nc(NC(C)C)nc(n1)OC	503	3.5
143	1634-78-2	Malaoxon	CCOC(=O)C(SP(=O)(OC)OC)CC(=O)OCC	158	200
144	1646-88-4	Aldicarb sulfone	CNC(=O)ON=CC(C)(C)S(=O)(=O)C	20	0.6
145	1649-18-9	Azaperone	c1cc(F)ccc1C(=O)CCCN2CCN(CC2)c3ccccn3	245	2.5
146	16672-87-0	Ethephon	ClCCP(=O)(O)O	3400	15
147	16752-77-5	Methomyl	CSC(C)=NOC(=O)NC	14.7	5
148	1689-84-5	Bromoxynil	N#Cc1cc(Br)c(O)c(Br)c1	190	5
149	1689-99-2	Bromoxynil octanoate	N#Cc1cc(Br)c(c(Br)c1)OC(=O)CCCCCCC	250	15
150	17026-81-2	Amino-4-ethoxy-acetanilide, 3-	CC(=O)Nc(c1)ccc(c1N)OCC	631	316
151	17804-35-2	Benomyl	CCCCNC(=O)n(c(c12)cccc1)c(n2)NC(=O)OC	10000	5
152	17924-92-4	Zearalenone	O=C1OC(C)CCCC(=O)CCCC=Cc(c12)cc(O)cc2O	16000	3
153	1861-32-1	Dacthal	COC(=O)c1c(Cl)c(Cl)c(c(Cl)c1Cl)C(=O)OC	3000	50
154	1897-45-6	Chlorothalonil	N#Cc1c(Cl)c(C#N)c(Cl)c(Cl)c1Cl	10000	5
155	19044-88-3	Oryzaline	CCCN(CCC)c1c([N+]([O-])=O)cc(S(=O)(=O)N)cc1[N+]([O-])=O	10000	12.5
156	1912-24-9	Atrazine	CC(C)Nc1nc(nc(n1)Cl)NCC	672	3.5
157	1918-00-9	Dicamba	O=C(O)c1c(OC)c(Cl)ccc1Cl	1039	3
158	1918-02-1	Picloram	O=C(O)c1c(Cl)c(N)c(Cl)c(n1)Cl	8200	20
159	1918-16-7	Propachlor	ClCC(=O)N(C(C)C)c1ccccc1	710	13.3
160	19666-30-9	Oxadiazone	CC(C)(C)c1nn(c(=O)o1)-c2c(Cl)cc(Cl)c(c2)OC(C)C	3500	0.5
161	2008-41-5	Butylate	CCSC(=O)N(CC(C)C)CC(C)C	4000	10
162	206-44-0	Fluoranthene	c1cccc(c1-c2c34)-c3cccc4ccc2	2000	125
163	2104-64-5	Ethyl p-nitrophenyl phenylphosphorothioate	c1ccccc1P(=S)(OCC)Oc(cc2)ccc2[N+]([O-])=O	7	0.25
164	21087-64-9	Metribuzin	CC(C)(C)c1c(=O)n(N)c(nn1)SC	1100	5
165	2164-17-2	Fluometuron	CN(C)C(=O)Nc(cc1C(F)(F)F)ccc1	1450	8
166	2212-67-1	Molinate	CCSC(=O)N1CCCCCC1	369	0.2
167	22224-92-6	Fenamiphos	CC(C)NP(=O)(OCC)Oc(c1)ccc(c1C)SC	8	0.1
168	22839-47-0	Aspartame	O=C(O)CC(N)C(=O)NC(C(=O)OC)Cc1ccccc1	10000	74
169	2303-17-5	Triallate	ClC(Cl)=C(Cl)CSC(=O)N(C(C)C)C(C)C	800	3
170	2312-35-8	Propargite	C#CCOS(=O)OC(CCCC1)C1Oc(cc2)ccc2C(C)(C)C	1480	2
171	23135-22-0	Oxamyl	CN(C)C(=O)C(SC)=NOC(=O)NC	2.5	2.5
172	23564-05-8	Thiophanate-methyl	COC(=O)NC(=S)Nc1c(cccc1)NC(=S)NC(=O)OC	6640	8
173	23696-28-8	Olaquindox	OCCNC(=O)c([n+]1[O-])c(C)[n+]([O-])c(c12)cccc2	1717	1
174	2385-85-5	Mirex	ClC12C3(Cl)C4(Cl)C5(Cl)C(Cl)(C1(Cl)C4(Cl)Cl)C2(Cl)C(Cl)(Cl)C35Cl	235	0.17
175	23950-58-5	Pronamide	C#CC(C)(C)NC(=O)c1cc(Cl)cc(Cl)c1	3350	2.5
176	2402-79-1	Tetrachloropyridine, 2,3,5,6-	Clc1c(Cl)nc(Cl)c(Cl)c1	1182	25
177	2425-06-1	Captafol	ClC(Cl)C(Cl)(Cl)SN(C1=O)C(=O)C(C12)CC=CC2	2500	2.8
178	2432-99-7	Aminoundecanoic acid, 11-	O=C(O)CCCCCCCCCCN	14700	1500
179	2439-01-2	Oxythioquinox	c1cc(C)cc(n2)c1nc(c23)sc(=O)s3	1100	2.2
180	2475-45-8	C.I. Disperse Blue 1	Nc1ccc(N)c(c12)C(=O)c3c(C2=O)c(N)ccc3N	3000	62
181	25013-16-5	Butylated hydroxyanisole	CC(C)(C)c1c(O)ccc(c1)OC	2000	115
182	25057-89-0	Bentazon	CC(C)N(C1=O)S(=O)(=O)Nc(c12)cccc2	1100	3.5
183	262-12-4	Dibenzo-p-dioxin	c1cccc(c12)Oc3c(O2)cccc3	1220	864
184	2691-41-0	Octahydro-1,3,5,7-tetranitro-1,3,5,7-tetrazocine	[O-][N+](=O)N1CN([N+]([O-])=O)CN([N+]([O-])=O)CN(C1)[N+]([O-])=O	6490	50
185	27314-13-2	Norfluzaron	FC(F)(F)c1cc(ccc1)-n(c2=O)ncc(c2Cl)NC	8000	10
186	2784-94-3	HC Blue No. 1	OCCN(CCO)c(cc1)cc([N+]([O-])=O)c1NC	500	300
187	28249-77-6	Thiobencarb	CCN(CC)C(=O)SCc1ccc(Cl)cc1	920	1
188	2832-40-8	C.I. Disperse Yellow	CC(=O)Nc(cc1)ccc1N=Nc(c(O)cc2)cc2C	14	250
189	2835-39-4	Allyl isovalerate	CC(C)CC(=O)OCC=C	230	62
190	29232-93-7	Pirimiphos-methyl	CCN(CC)c(n1)nc(cc1C)OP(=S)(OC)OC	1250	0.5
191	298-00-0	Methyl parathion	COP(=S)(OC)Oc(cc1)ccc1[N+]([O-])=O	6.01	0.025
192	298-04-4	Disulfoton	CCSCCSP(=S)(OCC)OCC	2.6	0.05
193	298-81-7	Methoxypsoralen, 8-	c1coc(c12)c(OC)c3c(c2)ccc(=O)o3	791	25
194	299-84-3	Fenchlorphos	COP(=S)(OC)Oc1c(Cl)cc(Cl)c(Cl)c1	625	15
195	299-86-5	Crufomate	CC(C)(C)c1cc(Cl)c(cc1)OP(=O)(NC)OC	460	3
196	300-76-5	Naled	ClC(Cl)(Br)C(Br)OP(=O)(OC)OC	92	0.2
197	303-47-9	Ochratoxin A	c1ccccc1CC(C(=O)O)NC(=O)c(c2O)cc(Cl)c(c23)CC(C)OC3=O	20	1
198	30560-19-1	Acephate	CC(=O)NP(=O)(OC)SC	700	2.5
199	315-18-4	Mexacarbate	CNC(=O)Oc(c1)cc(C)c(c1C)N(C)C	14	12
200	32534-81-9	Pentabromodiphenyl ether	c1c(Br)c(Br)cc(Br)c1Oc2c(Br)cc(Br)cc2	5000	1.77
201	32536-52-0	Octabromodiphenyl ether	Brc1c(Br)cc(c(Br)c1Br)Oc(c(Br)c2Br)cc(Br)c2Br	5000	2.51
202	330-54-1	Diuron	CN(C)C(=O)Nc(c1)ccc(Cl)c1Cl	1017	1
203	330-55-2	Linuron	CON(C)C(=O)Nc(c1)ccc(Cl)c1Cl	1146	1.25
204	33089-61-1	Amitraz	Cc(c1)ccc(c1C)N=CN(C)C=Nc(c2C)ccc(C)c2	400	1
205	33229-34-4	HC Blue No. 2	OCCN(CCO)c(cc1)cc([N+]([O-])=O)c1NCCO	500	310
206	333-41-5	Diazinon	CC(C)c1nc(C)cc(n1)OP(=S)(OCC)OCC	66	72
207	3337-71-1	Asulam	COC(=O)NS(=O)(=O)c(cc1)ccc1N	2000	36
208	33820-53-0	Isopropalin	CC(C)c1cc([N+]([O-])=O)c(c(c1)[N+]([O-])=O)N(CCC)CCC	5000	23.5
209	34014-18-1	Tebuthiuron	CC(C)(C)c1nnc(s1)N(C)C(=O)NC	644	7
210	34256-82-1	Acetochlor	CCOCN(C(=O)CCl)c(c1CC)c(C)ccc1	763	10
211	35367-38-5	Diflubenzuron	Fc1cccc(F)c1C(=O)NC(=O)Nc2ccc(Cl)cc2	4640	2
212	35554-44-0	Imazalil	c1cc(Cl)cc(Cl)c1C(OCC=C)Cn2ccnc2	227	10
213	36734-19-7	Iprodione	CC(C)NC(=O)N(CC1=O)C(=O)N1c2cc(Cl)cc(Cl)c2	3500	25
214	3689-24-5	Tetraethyldithiopyrophosphate	CCOP(=S)(OCC)OP(=S)(OCC)OCC	5	0.5
215	389-08-2	Nalidixic acid	O=C(O)c(c1=O)cn(CC)c(c12)nc(C)cc2	2040	100
216	396-01-0	Triamterene	Nc1nc(N)nc(c12)nc(N)c(n2)-c3ccccc3	400	40
217	40487-42-1	Pendilmethalin	CCC(CC)Nc(c1[N+]([O-])=O)c([N+]([O-])=O)cc(C)c1C	1050	25
218	42874-03-3	Oxyfluorfen	FC(F)(F)c1cc(Cl)c(cc1)Oc(cc2)cc(c2[N+]([O-])=O)OCC	5000	0.3
219	431-03-8	Diacetyl	CC(=O)C(=O)C	1580	90
220	43121-43-3	Bayleton	n1cncn1C(C(=O)C(C)(C)C)Oc2ccc(Cl)cc2	363	2.5
221	43210-67-9	Fenbendazole	COC(=O)Nc(n1)[nH]c(c12)ccc(c2)Sc3ccccc3	10000	5
222	4525-33-1	Dimethyldicarbonate	COC(=O)OC(=O)OC	260	590
223	458-37-7	Curcumin	c1cc(O)c(OC)cc1C=CC(=O)CC(=O)C=Cc2cc(OC)c(O)cc2	2000	186
224	4940-11-8	Ethyl maltol	CCc1c(O)c(=O)cco1	1150	200
225	50-00-0	Formaldehyde	C=O	100	15
226	50-18-0	Cyclophosphamide	ClCCN(CCCl)P1(=O)NCCCO1	100	3.4
227	50-29-3	1,1'-(2,2,2-trichloroethylidene) bis(4-chloro)-benzene	c1cc(Cl)ccc1C(C(Cl)(Cl)Cl)c2ccc(Cl)cc2	87	16
228	50-33-9	Phenylbutazone	CCCCC(C1=O)C(=O)N(c2ccccc2)N1c3ccccc3	245	25
229	50471-44-8	Vinclozolin	C=CC1(C)C(=O)N(C(=O)O1)c2cc(Cl)cc(Cl)c2	10000	24.3
230	50-53-3	Chlorpromazine	CN(C)CCCN1c(cccc2)c2Sc(c13)ccc(Cl)c3	142	1
231	50-81-7	Ascorbic acid	OCC(O)C(OC1=O)C(O)=C1O	11900	5.5
232	510-15-6	Chlorobenzilate	c1cc(Cl)ccc1C(O)(C(=O)OCC)c2ccc(Cl)cc2	700	2.2
233	51218-45-2	Metolachlor	COCC(C)N(C(=O)CCl)c(c1CC)c(C)ccc1	2200	15
234	51235-04-2	Hexazinone	CN(C)c1nc(=O)n(c(=O)n1C)C2CCCCC2	1690	10
235	513-86-0	Acetoin	CC(=O)C(C)O	5000	330
236	514-78-3	Canthaxanthin	C1CC(=O)C(C)=C(C1(C)C)C=CC(C)=CC=CC(C)=CC=CC=C(C)C=CC=C(C)C=CC(C2(C)C)=C(C)C(=O)CC2	20000	500
237	51630-58-1	Pydrin	c1cc(Cl)ccc1C(C(C)C)C(=O)OC(C#N)c2cc(ccc2)Oc3ccccc3	70.2	2.5
238	52225-20-4	Tocopheryl acetate, dl-alpha-	CC(=O)Oc(c1C)c(C)c(C)c(c12)OC(C)(CC2)CCCC(C)CCCC(C)CCCC(C)C	4000	1000
239	52315-07-8	Cypermethrin	ClC(Cl)=CC1C(C1(C)C)C(=O)OC(C#N)c2cc(ccc2)Oc3ccccc3	57.5	0.5
240	5234-68-4	Carboxin	S1CCOC(C)=C1C(=O)Nc2ccccc2	430	10
241	52645-53-1	Permethrin	ClC(Cl)=CC1C(C1(C)C)C(=O)OCc2cc(ccc2)Oc3ccccc3	383	3
242	5307-14-2	Nitro-p-phenylenediamine, 2-	Nc1c([N+]([O-])=O)cc(N)cc1	2100	43
243	534-73-6	Isomaltitol	OCC(O)C(O)C(O)C(O)COC(C1O)OC(CO)C(O)C1O	44000	2927
244	53716-50-0	Oxfendazole	COC(=O)Nc(n1)[nH]c(c12)ccc(c2)S(=O)c3ccccc3	6400	3.8
245	5392-40-5	Citral	O=CC=C(C)CCC=C(C)C	4960	887
246	542-75-6	Dichloropropene, 1,3-	ClCC=CCl	470	3
247	54350-48-0	Etretinate	CCOC(=O)C=C(C)C=CC=C(C)C=Cc1c(C)c(C)c(OC)cc1C	4000	6
248	545-06-2	Trichloroacetonitrile	N#CC(Cl)(Cl)Cl	250	1
249	546-80-5	Thujone	CC(C)C12C(C1)C(C)C(=O)C2	500	5
250	5471-51-2	Hydroxybenzyl acetone, p-	CC(=O)CCc1ccc(O)cc1	1320	100
251	54965-21-8	Albendazole	COC(=O)Nc(n1)[nH]c(c12)ccc(c2)SCCC	2400	1
252	55283-68-6	Ethalfuralin	C=C(C)CN(CC)c(c(c1)[N+]([O-])=O)c([N+]([O-])=O)cc1C(F)(F)F	10000	75
253	55285-14-8	Carbosulfan	CC(C)(C1)Oc(c12)c(ccc2)OC(=O)N(C)SN(CCCC)CCCC	51	1
254	55290-64-7	Dimethipin	O=S1(=O)C(C)=C(C)S(=O)(=O)CC1	1150	2
255	55331-29-8	Zeranol	O=C1OC(C)CCCC(O)CCCCCc(c12)cc(O)cc2O	40000	0.02
256	55-38-9	Fenthion	Cc1c(SC)ccc(c1)OP(=S)(OC)OC	180	16
257	556-88-7	Nitroguanidine	N=C(N)N[N+]([O-])=O	10200	316
258	56038-13-2	Trichlorogalactosucrose	ClCC(O1)C(O)C(O)C1(CCl)OC(O2)C(O)C(O)C(Cl)C2CO	10000	294
259	56-23-5	Carbon tetrachloride	ClC(Cl)(Cl)Cl	2350	0.71
260	563-12-2	Ethion	CCOP(=S)(OCC)SCSP(=S)(OCC)OCC	13	0.2
261	5634-39-9	Iodinated glycerol	CC(I)C1OC(CO1)CO	6000	125
262	56-38-2	Parathion	CCOP(=S)(OCC)Oc(cc1)ccc1[N+]([O-])=O	2	1.8
263	56425-91-3	Flurprimidol	c1ncncc1C(O)(C(C)C)c2ccc(cc2)OC(F)(F)F	709	2
264	56-72-4	Coumaphos	CCOP(=S)(OCC)Oc(cc1)cc(c12)oc(=O)c(Cl)c2C	13	0.4
265	56-81-5	Glycerol	OCC(O)CO	12600	3442
266	57-55-6	Propylene glycol	CC(O)CO	20000	2500
267	576-26-1	Dimethylphenol, 2,6-	Cc1c(O)c(C)ccc1	296	0.6
268	57-66-9	Probenecid	O=C(O)c1ccc(cc1)S(=O)(=O)N(CCC)CCC	1600	100
269	57-74-9	Chlordane	ClC1=C(Cl)C(Cl)(C2(Cl)Cl)C(C3C12Cl)CC(Cl)C3Cl	200	0.055
270	57808-65-8	Closantel	c1cc(Cl)ccc1C(C#N)c2c(Cl)cc(c(C)c2)NC(=O)c3c(O)c(I)cc(I)c3	262	2.5
271	57837-19-1	Metalaxyl	COC(=O)C(C)N(C(=O)COC)c(c1C)c(C)ccc1	566	12.5
272	58-08-2	Caffeine	Cn1cnc(c12)n(C)c(=O)n(C)c2=O	192	10.1
273	58138-08-2	Tridiphane	ClC(Cl)(Cl)CC1(CO1)c2cc(Cl)cc(Cl)c2	1500	0.33
274	5836-10-2	Chloropropylate	c1cc(Cl)ccc1C(O)(C(=O)OC(C)C)c2ccc(Cl)cc2	5000	2.9
275	585-86-4	Lactitol	OCC(O)C(O)C(C(O)CO)OC(C1O)OC(CO)C(O)C1O	10000	1472
276	58-89-9	Hexachlorocyclohexane, gamma-	ClC1C(Cl)C(Cl)C(Cl)C(Cl)C1Cl	76	2.5
277	58-90-2	Tetrachlorophenol, 2,3,4,6-	Oc1c(Cl)c(Cl)c(Cl)cc1Cl	140	25
278	58-93-5	Hydrochlorothiazide	N1CNS(=O)(=O)c(c12)cc(c(Cl)c2)S(=O)(=O)N	2750	609
279	5902-51-2	Terbacil	CC(C)(C)n(c(=O)[nH]1)c(=O)c(Cl)c1C	1700	7.5
280	59-02-9	Tocopherol, alpha-	CC(C)CCCC(C)CCCC(C)CCCC(C)(CC1)Oc(c12)c(C)c(C)c(O)c2C	4000	310
281	597-25-1	Dimethyl morpholinophosphoramidate	COP(=O)(OC)N1CCOCC1	5910	200
282	59756-60-4	Fluridone	FC(F)(F)c1cc(ccc1)-c2c(=O)c(cn(C)c2)-c3ccccc3	10000	8
283	5977-14-0	Acetoacetamide	CC(=O)CC(=O)N	500	177
284	598-55-0	Methyl carbamate	NC(=O)OC	2500	100
285	59-87-0	Nitrofurazone	NC(=O)NN=Cc1ccc(o1)[N+]([O-])=O	590	16
286	5989-27-5	Limonene, d-	C=C(C)C(CC1)CC=C1C	4400	250
287	60207-90-1	Propiconazole	n1cncn1CC2(OC(CO2)CCC)c3c(Cl)cc(Cl)cc3	1517	5
288	60-29-7	Ethyl ether	CCOCC	1215	500
289	60-51-5	Dimethoate	CNC(=O)CSP(=S)(OC)OC	60	0.05
290	60-57-1	Dieldrin	ClC12C3C4C5C(O5)C(C4)C3C(Cl)(C2(Cl)Cl)C(Cl)=C1Cl	38.3	0.005
291	609-20-1	Dichloro-p-phenylenediamine, 2,6-	Nc1c(Cl)cc(N)cc1Cl	700	100
292	616-23-9	Dichloropropanol, 2,3-	ClCC(Cl)CO	90	10
293	616-38-6	Dimethylcarbonate	COC(=O)OC	13000	1475
294	619-17-0	Nitroanthranilic acid, 4-	O=C(O)c1c(N)cc([N+]([O-])=O)cc1	640	363
295	62-73-7	Dichlorvos	ClC(Cl)=COP(=O)(OC)OC	17	0.23
296	63-25-2	Carbaryl	CNC(=O)Oc1cccc(c12)cccc2	230	9.6
297	63659-18-7	Betaxolol	CC(C)NCC(O)COc(cc1)ccc1CCOCC2CC2	955	12
298	63-91-2	Phenylalanine	O=C(O)C(N)Cc1ccccc1	5287	835
299	64-17-5	Ethanol	OCC	7060	5241
300	64-19-7	Acetic acid	O=C(C)O	3310	726
301	6471-49-4	C.I. Pigment Red 23	c1ccc([N+]([O-])=O)cc1NC(=O)c(cc(c23)cccc3)c(O)c2N=Nc4c(OC)ccc(c4)[N+]([O-])=O	5000	1100
302	64902-72-3	Chlorsulfuron	COc(n1)nc(nc1C)NC(=O)NS(=O)(=O)c2c(Cl)cccc2	5545	5
303	65-85-0	Benzoic acid	O=C(O)c1ccccc1	1700	887
304	66215-27-8	Cyromazine	C1CC1Nc2nc(N)nc(n2)N	3387	1.5
305	66332-96-5	Flutolanil	c1cccc(C(F)(F)F)c1C(=O)Nc2cc(ccc2)OC(C)C	10000	40
306	66841-25-6	Tralomethrin	BrC(Br)(Br)C(Br)C1C(C1(C)C)C(=O)OC(C#N)c2cc(ccc2)Oc3ccccc3	99	0.75
307	67-20-9	Nitrofurantoin	O=C1CN(C(=O)N1)N=Cc2ccc(o2)[N+]([O-])=O	604	130
308	67485-29-4	Amdro	FC(F)(F)c1ccc(cc1)C=CC(C=Cc(cc2)ccc2C(F)(F)F)=NN=C(NC3)NCC3(C)C	1131	2.5
309	67-56-1	Methanol	CO	5628	500
310	67-63-0	Isopropyl alcohol	CC(C)O	5045	0.018
311	67-64-1	Acetone	CC(=O)C	5800	100
312	67-66-3	Chloroform	ClC(Cl)Cl	695	30
313	67-72-1	Hexachloroethane	ClC(Cl)(Cl)C(Cl)(Cl)Cl	4460	1
314	67747-09-5	Prochloraz	c1nccn1C(=O)N(CCC)CCOc2c(Cl)cc(Cl)cc2Cl	1600	5
315	68085-85-8	Cyhalothrin	FC(F)(F)C(Cl)=CC1C(C1(C)C)C(=O)OC(C#N)c2cc(ccc2)Oc3ccccc3	144	0.5
316	68-26-8	Retinol	OCC=C(C)C=CC=C(C)C=CC(C1(C)C)=C(C)CCC1	2000	10
317	68359-37-5	Baythroid	ClC(Cl)=CC1C(C1(C)C)C(=O)OC(C#N)c2cc(c(F)cc2)Oc3ccccc3	900	2.5
318	69409-94-5	Fluvalinate	FC(F)(F)c1cc(Cl)c(cc1)NC(C(C)C)C(=O)OC(C#N)c2cc(ccc2)Oc3ccccc3	261	1
319	69806-40-2	Haloxyfop-methyl	COC(=O)C(C)Oc1ccc(cc1)Oc(nc2)c(Cl)cc2C(F)(F)F	393	0.005
320	70-30-4	Hexachlorophene	Clc1c(Cl)cc(Cl)c(O)c1Cc2c(O)c(Cl)cc(Cl)c2Cl	56	1
321	709-98-8	Propanit	CCC(=O)Nc(c1)ccc(Cl)c1Cl	367	5
322	71-36-3	Butanol, n-	OCCCC	790	125
323	71-55-6	Trichloroethane, 1,1,1-	ClC(Cl)(Cl)C	9600	1000
324	7235-40-7	Carotene, beta-	C1CCC(C)=C(C1(C)C)C=CC(C)=CC=CC(C)=CC=CC=C(C)C=CC=C(C)C=CC(C2(C)C)=C(C)CCC2	5000	89
325	72-43-5	Methoxychlor	COc(cc1)ccc1C(C(Cl)(Cl)Cl)c2ccc(cc2)OC	1855	5
326	7287-19-6	Prometryn	CC(C)Nc1nc(NC(C)C)nc(n1)SC	2100	12
327	732-11-6	Phosmet	COP(=S)(OC)SCN(C1=O)C(=O)c(c12)cccc2	92.5	2
328	74115-24-5	Apollo	c1cccc(Cl)c1-c2nnc(nn2)-c3c(Cl)cccc3	3200	2
329	74223-64-6	Ally	COC(=O)c1c(cccc1)S(=O)(=O)NC(=O)Nc(nc2C)nc(n2)OC	5000	25
330	74-83-9	Bromomethane	CBr	214	2
331	75-01-4	Vinyl chloride	ClC=C	500	30
332	75-05-8	Acetonitrile	N#CC	2460	190
333	75-09-2	Dichloromethane	ClCCl	1600	5
334	75-25-2	Tribromomethane	BrC(Br)Br	933	100
335	75-27-4	Bromodichloromethane	ClC(Cl)Br	430	24
336	75-34-3	Dichloroethane, 1,1-	ClC(Cl)C	725	1442
337	75-35-4	Dichloroethylene, 1,1-	ClC(Cl)=C	670	15
338	75-50-3	Trimethylamine	CN(C)C	500	138
339	756-79-6	Dimethyl methylphosphonate	COP(=O)(C)OC	8210	1000
340	75-71-8	Dichlorodifluoromethane	FC(F)(Cl)Cl	5.6	15
341	75-99-0	Dalapony sodium salt	O=C(O)C(Cl)(Cl)C	5000	8.45
342	759-94-4	Ethyl dipropylthiocarbamate, s-	CCSC(=O)N(CCC)CCC	916	3
343	76-01-7	Pentachloroethane	ClC(Cl)(Cl)C(Cl)Cl	920	125
344	76-44-8	Heptachlor	ClC1=C(Cl)C(Cl)(C2(Cl)Cl)C(C3C12Cl)C(Cl)C=C3	40	0.25
345	76-57-3	Codeine	O1C2C(O)C=CC3C(N(C)CC4)Cc5ccc(c1c5C234)OC	427	150
346	76578-14-8	Assure	CCOC(=O)C(C)Oc1ccc(cc1)Oc(cn2)nc(c23)ccc(Cl)c3	1480	0.9
347	76738-62-0	Paclobutrazol	n1cncn1C(C(O)C(C)(C)C)Cc2ccc(Cl)cc2	1300	12.5
348	7681-76-7	Ronidazole	NC(=O)OCc1ncc([N+]([O-])=O)n1C	3400	10
349	77-47-4	Hexachlorocyclopentadiene	ClC1(Cl)C(Cl)=C(Cl)C(Cl)=C1Cl	315	10
350	77501-63-4	Lactofen	CCOC(=O)C(C)OC(=O)c1c([N+]([O-])=O)ccc(c1)Oc(cc2)c(Cl)cc2C(F)(F)F	5000	2.5
351	77-79-2	Sulfolene, 3-	C1C=CCS1(=O)=O	2547	311
352	77-83-8	Ethylmethylphenylglycidate	CCOC(=O)C(O1)C1(C)c2ccccc2	5470	35
353	78-11-5	Pentaerythritol tetranitrate	[O-][N+](=O)OCC(CO[N+]([O-])=O)(CO[N+]([O-])=O)CO[N+]([O-])=O	1660	700
354	78-48-8	Merphos oxide	CCCCSP(=O)(SCCCC)SCCCC	150	0.25
355	78587-05-0	Savey	C1CCCCC1NC(=O)N(C2=O)C(C)C(S2)c3ccc(Cl)cc3	5000	23
356	78-59-1	Isophorone	C1C(=O)C=C(C)CC1(C)C	1870	500
357	78-83-1	Isobutyl alcohol	CC(C)CO	2460	316
358	78-87-5	Propylene dichloride	CC(Cl)CCl	1947	30
359	78-92-2	Butanol, 2-	CC(O)CC	2193	1644
360	79-00-5	Trichloroethane, 1,1,2-	ClC(Cl)CCl	836	4
361	79-06-1	Acrylamide	NC(=O)C=C	124	0.2
362	79-08-3	Bromoacetic acid, 2-	O=C(CBr)O	50	50
363	79-10-7	Acrilic acid	O=C(O)C=C	33.5	53
364	79-11-8	Chloroacetic acid	O=C(CCl)O	55	15
365	79277-27-3	Harmony	COC(=O)c1c(ccs1)S(=O)(=O)NC(=O)Nc(nc2C)nc(n2)OC	5000	1
366	79-34-5	Tetrachloroethane, 1,1,2,2-	ClC(Cl)C(Cl)Cl	200	62
367	79-41-4	Methyl metacrylate	C=C(C)C(=O)O	1060	8.4
368	80-05-7	Bisphenol A	c1cc(O)ccc1C(C)(C)c2ccc(O)cc2	3250	56
369	8013-90-9	Ionone	CC(=O)C=CC(C1(C)C)C(C)=CCC1	4590	10
370	81-07-2	Saccharin	O=C1NS(=O)(=O)c(c12)cccc2	1600	360
371	81335-37-7	Imazaquin	c1cccc(c12)nc(c(c2)C(=O)O)C(=N3)NC(=O)C3(C)C(C)C	4073	150
372	82097-50-5	Trisulfuron	COc(n1)nc(nc1C)NC(=O)NS(=O)(=O)c(c2OCCCl)cccc2	5050	1
373	82558-50-7	Isoxaben	CCC(C)(CC)c1cc(on1)NC(=O)c2c(OC)cccc2OC	10000	5
374	82657-04-3	Biphenthrin	FC(F)(F)C(Cl)=CC1C(C1(C)C)C(=O)OCc(c2C)cccc2-c3ccccc3	54.5	1
375	82-68-8	Pentachloronitrobenzene	[O-][N+](=O)c1c(Cl)c(Cl)c(Cl)c(Cl)c1Cl	1100	225
376	828-00-2	Dimethoxane	CC(=O)OC(CC1C)OC(O1)C	1930	62.5
377	83055-99-6	Londax	COC(=O)c1c(cccc1)CS(=O)(=O)NC(=O)Nc(n2)nc(OC)cc2OC	5000	30
378	83-32-9	Acenaphtene	c12c3cccc2cccc1CC3	600	175
379	834-12-8	Ametryn	CC(C)Nc1nc(NCC)nc(n1)SC	508	10
380	83-79-4	Rotenone	C=C(C)C(C1)Oc(c12)ccc3c2OC4C(C3=O)c5c(OC4)cc(OC)c(c5)OC	60	0.38
381	83-88-5	Riboflavin	O=c1[nH]c(=O)nc(-c12)n(CC(O)C(O)C(O)CO)c3c(n2)cc(C)c(C)c3	10000	4
382	84-66-2	Diethyl phthalate	CCOC(=O)c1c(C(=O)OCC)cccc1	8600	2218
383	84-72-0	Ethylphthalyl ethylglycolate	CCOC(=O)COC(=O)c1c(C(=O)OCC)cccc1	15000	250
384	84-74-2	Dibutyl phthalate	CCCCOC(=O)c1c(cccc1)C(=O)OCCCC	9410	125
385	85-44-9	Phthalic anhydride	O=C1OC(=O)c(c12)cccc2	1530	592
386	85-68-7	Butyl benzyl phthalate	CCCCOC(=O)c1c(cccc1)C(=O)OCc2ccccc2	2330	1228
387	86-30-6	Nitrosodiphenylamine, N-	c1ccccc1N(N=O)c2ccccc2	1825	400
388	86-50-0	Azinphos methyl	COP(=S)(OC)SCn(c1=O)nnc(c12)cccc2	7	0.18
389	86-54-4	Hydralazine	c1cccc(c12)cnnc2NN	90	30
390	86-57-7	Nitronaphtalene, 1-	c1cccc(c12)cccc2[N+]([O-])=O	150	55
391	87-20-7	Isoamyl salicylate	CC(C)CCOC(=O)c1c(O)cccc1	3300	4.7
392	87-68-3	Hexachlorobutadiene	ClC(Cl)=C(Cl)C(Cl)=C(Cl)Cl	82	1
393	87-86-5	Pentachlorophenol	Oc1c(Cl)c(Cl)c(Cl)c(Cl)c1Cl	27	3
394	87-99-0	Xylitol	OCC(O)C(O)C(O)CO	16500	100
395	88-09-5	Ethylbutyric acid, 2-	CCC(C(=O)O)CC	2200	534
396	886-50-0	Terbutryn	CC(C)(C)Nc1nc(NCC)nc(n1)SC	2045	0.1
397	88671-89-0	Systhane	n1cncn1CC(C#N)(CCCC)c2ccc(Cl)cc2	1600	2.32
398	88-85-7	Dinoseb	CCC(C)c1c(O)c([N+]([O-])=O)cc(c1)[N+]([O-])=O	25	3
399	89-25-8	Phenyl-3-methyl-5-pyrazolone, 1-	CC1=NN(C(=O)C1)c2ccccc2	1915	1297
400	90982-32-4	Chlorimuron-ethyl	CCOC(=O)c1c(cccc1)S(=O)(=O)NC(=O)Nc(n2)nc(Cl)cc2OC	4102	13
401	91-58-7	Chloronaphtalene, beta-	c1cccc(c12)ccc(Cl)c2	2078	250
402	91-64-5	Coumarin	c1cccc(c12)oc(=O)cc2	293	150
403	924-42-5	Methylolacrylamide, N-	C=CC(=O)NCO	474	12.5
404	92-52-4	Biphenyl, 1,1-	c1ccccc1-c2ccccc2	2140	50
405	93-65-2	2-(2-methyl-4-chlorophenoxy) propionic acid	O=C(O)C(C)Oc(c1C)ccc(Cl)c1	650	2.5
406	93-72-1	2(2,4,5-trichlorophenoxy) propionic acid	O=C(O)C(C)Oc1c(Cl)cc(Cl)c(Cl)c1	650	2.6
407	93-76-5	Trichlorophenoxyacetic acid, 2,4,5-	O=C(O)COc1c(Cl)cc(Cl)c(Cl)c1	300	3
408	93-92-5	Methylphenylcarbinyl acetate	CC(=O)OC(C)c1ccccc1	5000	50
409	94-13-3	Hydroxybenxoic acid propyl ester, p-	CCCOC(=O)c1ccc(O)cc1	501	150
410	94-26-8	Hydroxybenzoic acid butyl ester, p-	CCCCOC(=O)c1ccc(O)cc1	50	900
411	944-22-9	Fonofos	CCOP(=S)(CC)Sc1ccccc1	3	0.5
412	94-74-6	Methyl-4-chlorophenoxyacetic acid, 2-	O=C(O)COc(c1C)ccc(Cl)c1	700	7.5
413	94-75-7	Dichlorophenoxyacetic acid, 2,4-	O=C(O)COc1c(Cl)cc(Cl)cc1	375	1
414	94-81-5	4-(2-methyl-4-chlorophenoxy) butyric acid	O=C(O)CCCOc(c1C)ccc(Cl)c1	680	12
415	950-37-8	Methidathion	COP(=S)(OC)SCn(c(=O)s1)nc1OC	20	0.2
416	95-49-8	Chlorotoluene, o-	Cc1c(Cl)cccc1	3900	20
417	95-50-1	Dichlorobenzene, 1,2-	Clc1c(Cl)cccc1	500	60
418	95-57-8	Chlorophenol, 2-	Oc1c(Cl)cccc1	40	5
419	95-65-8	Dimethylphenol, 3,4-	Cc1c(C)ccc(c1)O	727	1.4
420	95-74-9	Chloro-p-toluidine, 3-	Cc1c(Cl)cc(N)cc1	1500	52
421	957-51-7	Diphenamid	c1ccccc1C(C(=O)N(C)C)c2ccccc2	685	10
422	95-95-4	Trichlorophenol, 2,4,5-	Oc1c(Cl)cc(Cl)c(Cl)c1	820	100
423	961-11-5	Tetrachlorvinphos	COP(=O)(OC)OC(=CCl)c1c(Cl)cc(Cl)c(Cl)c1	4000	6
424	96-23-1	Dichloro-2-propanol, 1,3-	ClCC(CCl)O	110	1
425	96-29-7	Methyl ethyl ketoxime	ON=C(C)CC	930	14
426	96-45-7	Ethylene thiourea	S=C1NCCN1	1832	1.7
427	96-48-0	Butyrolactone, y-	O=C1CCCO1	1540	525
428	97-53-0	Eugenol	C=CCc1cc(OC)c(O)cc1	1930	79.3
429	97-77-8	Tetraethylthiourea disulfide	CCN(CC)C(=S)SSC(=S)N(CC)CC	500	17
430	98-01-1	Furfural	O=Cc1ccco1	65	30
431	98-82-8	Cumene	CC(C)c1ccccc1	1400	154
432	99-49-0	Carvone	O=C1CC(C(=C)C)CC=C1C	1640	125
433	99-55-8	Nitro-o-toluidine, 5-	Cc1c(N)cc([N+]([O-])=O)cc1	574	4
434	99-57-0	Amino-4-nitrophenol, 2-	Nc1c(O)ccc(c1)[N+]([O-])=O	2400	250
435	99-65-0	Dinitrobenzene, m-	[O-][N+](=O)c1cc([N+]([O-])=O)ccc1	59.5	0.4
436	99-76-3	Hydroxybenxoic acid methyl ester, p-	COC(=O)c1ccc(O)cc1	2100	150

## Sheet: 5_outliers
Table S2. The excluded five compounds from the dataset of 441 compounds.
Sr.	CAS	Name	Smile	LD50	NOEL
1	1401-69-0	Tylosin	CC1(O)C(O)C(C)OC(C1)OC(C2C)C(N(C)C)C(O)C(O2)OC(C(CC=O)CC(C)C(=O)C=C3)C(C)C(O)CC(=O)OC(CC)C(C=C3C)COC(O4)C(OC)C(OC)C(O)C4C	5000	50
2	50-55-5	Reserpine	COc(c1)c(OC)c(OC)cc1C(=O)OC(C2)C(OC)C(C(=O)OC)C(C3)C2CN(CC4)C3c(c4c56)[nH]c5cc(cc6)OC	420	0.58
3	65195-55-3	Avermectin B1	CCC(C)C(O1)C(C)C=CC12CC3CC(O2)CC=C(C)C(C(C)C=CC=C4C5(O)C(OC4)C(O)C(C)=CC5C(=O)O3)OC(O6)CC(OC)C(C6C)OC(O7)CC(OC)C(O)C7C	300	0.03
4	73684-69-2	Miporamicin	CC1C(O)C(OC)C(OC)C(O1)OCC2(O)C(CC)OC(=O)C=CC(C)C(OC(O3)C(O)C(N(C)C)CC3C)C(C)CC(C)C(=O)C=CC(O4)C24	2000	40
5	7585-39-9	Cyclodextrin, beta-	OCC(C12)OC(C(O)C1O)OC3C(CO)OC(C(O)C3O)OC4C(CO)OC(C(O)C4O)OC5C(CO)OC(C(O)C5O)OC6C(CO)OC(C(O)C6O)OC7C(CO)OC(C(O)C7O)OC8C(CO)OC(O2)C(O)C8O	18800	400
